# Supplementary material for: A novel dark-field microscopy technique coupled with capillary electrophoresis for visual analysis of single nanoparticles
Source: Royal Society of Chemistry journal article supplement (doi:10.1039/c3an00408b), 2013-01-01
Supplement: c3an00408b.pdf [file c3an00408b.pdf]

**A novel dark-field microscopy coupled with  
capillary electrophoresis for single nanoparticles visual analysis**

*Electronic Supplementary Information*

Libo Li, Huan Yu, Dong Liu, Tianyan You\*

*State Key Laboratory of Electroanalytical Chemistry, Changchun Institute of Applied  
Chemistry, Chinese Academy of Sciences, Changchun, 130022 Jilin, China*

*\*To whom correspondence should be addressed.*

*\* Phone and fax: +86-431-85262850. E-mail: [youty@ciac.jl.cn](mailto:youty@ciac.jl.cn)*

**Video 1.** Movement of CTAB-capped AuNPs (red) and SDS-capped AuNPs (green) in capillary at low electric field. Images were captured with a  $\times 40$  objective lens and true-colour digital camera (Nikon DS-fi). CE conditions: running buffer, 5 mmol/L PBS at pH 9.0; electrokinetic injection, 5 kV; separation voltage, 0.6 kV.
